TITLE : COMPONENTS OF PEEP-INDUCED LUNG-THORAX VOLUME INCREASE

AUTHORS : J. A. Katz, M.D., S. E. Zinn, M.D., G. M. Ozanne, M.D., and  
H. B. Fairley, M.B., B.S.

AFFILIATION : Department of Anesthesia, University of California at San Francisco  
San Francisco General Hospital, San Francisco, California 94110

**Introduction.** PEEP may improve oxygen exchange by increasing FRC. If unstable lung is recruited at end-inspiration, PEEP may prevent its collapse at end-expiration, and this volume increase would be complete within the first tidal breath after a step change in PEEP. This increase would be proportional to the total respiratory system compliance ( $C_{LT}$ ). PEEP may also result in an additional increase in lung volume by overcoming forces which require a longer inflation time than the usual end-inspiratory pause. Thus, the full increase in FRC with PEEP would take several breaths and would be larger than that indicated by the  $C_{LT}$ . Our objective was to investigate the relative contributions of these two mechanisms.

**Methods.** 13 adult patients requiring mechanical ventilation for APF were studied. Each was ventilated at a constant rate ( $F_{I}O_2$  0.5 and  $V_T$  13-15% predicted TLC). Airway and esophageal pressure, expired tidal volume ( $V_E$ ), FRC,  $P_{i}O_2$ ,  $P_{a}O_2$ , and  $P_{a}CO_2$  were measured at increments of 5 cmH<sub>2</sub>O of PEEP. Breath-by-breath expired tidal volume was measured after the application of 10 cmH<sub>2</sub>O PEEP in nine patients, to determine the time dependency of the lung volume change. This was also examined when PEEP was applied after two hyperinflations. **Calculations.** 1) Total respiratory system compliance ( $C_{LT}$ ),  $V_E/\Delta P_{aw}$ , derived from the difference between a period of zero end-inspiratory flow of 1.2 seconds and end-expiration 2) FRC compliance ( $C_{FRC}$ ) from  $\Delta FRC/\Delta PEEP$  3)  $P(A-a)O_2$ . The study was approved by the Human Research Committee and informed consent was obtained for each patient.

**Results.** The mean initial FRC (55% of predicted supine; range 26-101%) correlated with the initial  $C_{LT}$  ( $r=0.82$ ;  $P<0.001$ ). Figure 1, is a pressure-volume diagram of the mean LT data. The  $C_{FRC}$  increased with increments of PEEP. At each PEEP level the corresponding  $C_{FRC}$  is larger than the  $C_{LT}$ . These differences are significant at PEEP levels of 8 and 13 cmH<sub>2</sub>O. Thus, at the same lung volume, there is a pressure difference between the end-inspiratory and end-expiratory data. Conversely, a volume difference exists between end-inspiration and end-expiration at the same pressure. The volume difference between the end-inspiratory and end-expiratory data maintained by PEEP at 18 cmH<sub>2</sub>O, was computed for each patient. This correlated inversely with the associated improvement in  $P(A-a)O_2$  ( $r=-0.69$ ;  $P<0.05$ ). The additional volume was  $38\pm 9\%$  (SD) of the total FRC change. The relative contributions of the lung and chest wall to the observed LT changes were measured in ten patients. At iso-lung volume the

pressure difference between the end-inspiratory and end-expiratory data was distributed across both the lung and chest wall with the lung component accounting for  $0.63\pm 0.25$  (SD) of the total LT changes. After a step change in PEEP of 10 cmH<sub>2</sub>O,  $68\pm 17\%$  (SD) of the total FRC change was complete within the first breath and the volume retained by the patient on the first breath correlated directly with  $C_{LT}$  ( $r=0.91$ ;  $P<0.001$ ). Breath-by-breath  $V_E$  showed a 98% return to steady state in  $4.4\pm 3$  (SD) breaths, ( $27\pm 19$  sec). Prior hyperinflation of the lung did not alter the findings.

**Discussion.** Three time-dependent factors may explain the observed volume changes 1) normal pressure-volume hysteresis 2) stress relaxation 3) recruitment of non-ventilated lung. These data do not permit quantitative discrimination between these factors. We conclude that both the prevention of collapse of unstable alveoli and time-dependent lung and chest wall factors are involved in the mechanism by which PEEP increases FRC and improves oxygen exchange. 98% of the time course of the induced volume change occurs in 2-60 sec.  $C_{LT}$  incompletely describes the elastic properties of the lung and its responses to PEEP.

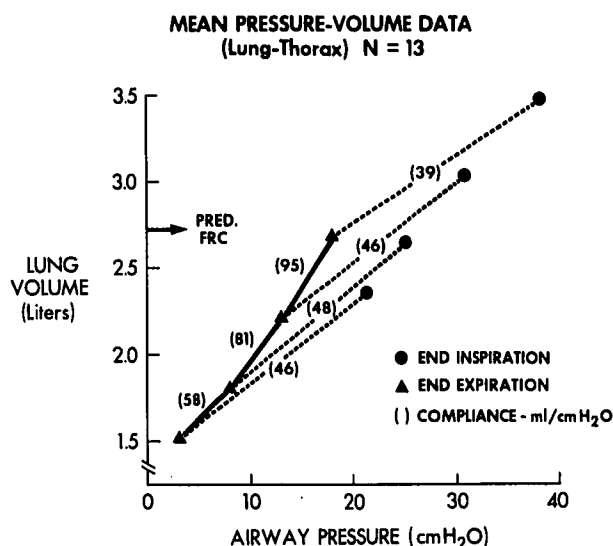

Figure 1

Supported in part by grant #GM24023.
